# Supplementary material for: Dietary Intake and Food Sources of Niacin, Riboflavin, Thiamin and Vitamin B6 in a Representative Sample of the Spanish Population. The ANIBES Study
Source: MDPI journal article supplement (doi:10.3390/nu10070846), 2018-06-29

**Figure S1.** Contribution of food sources to the daily thiamin, riboflavin, niacin vitamins B6 intake in the ANIBES children.

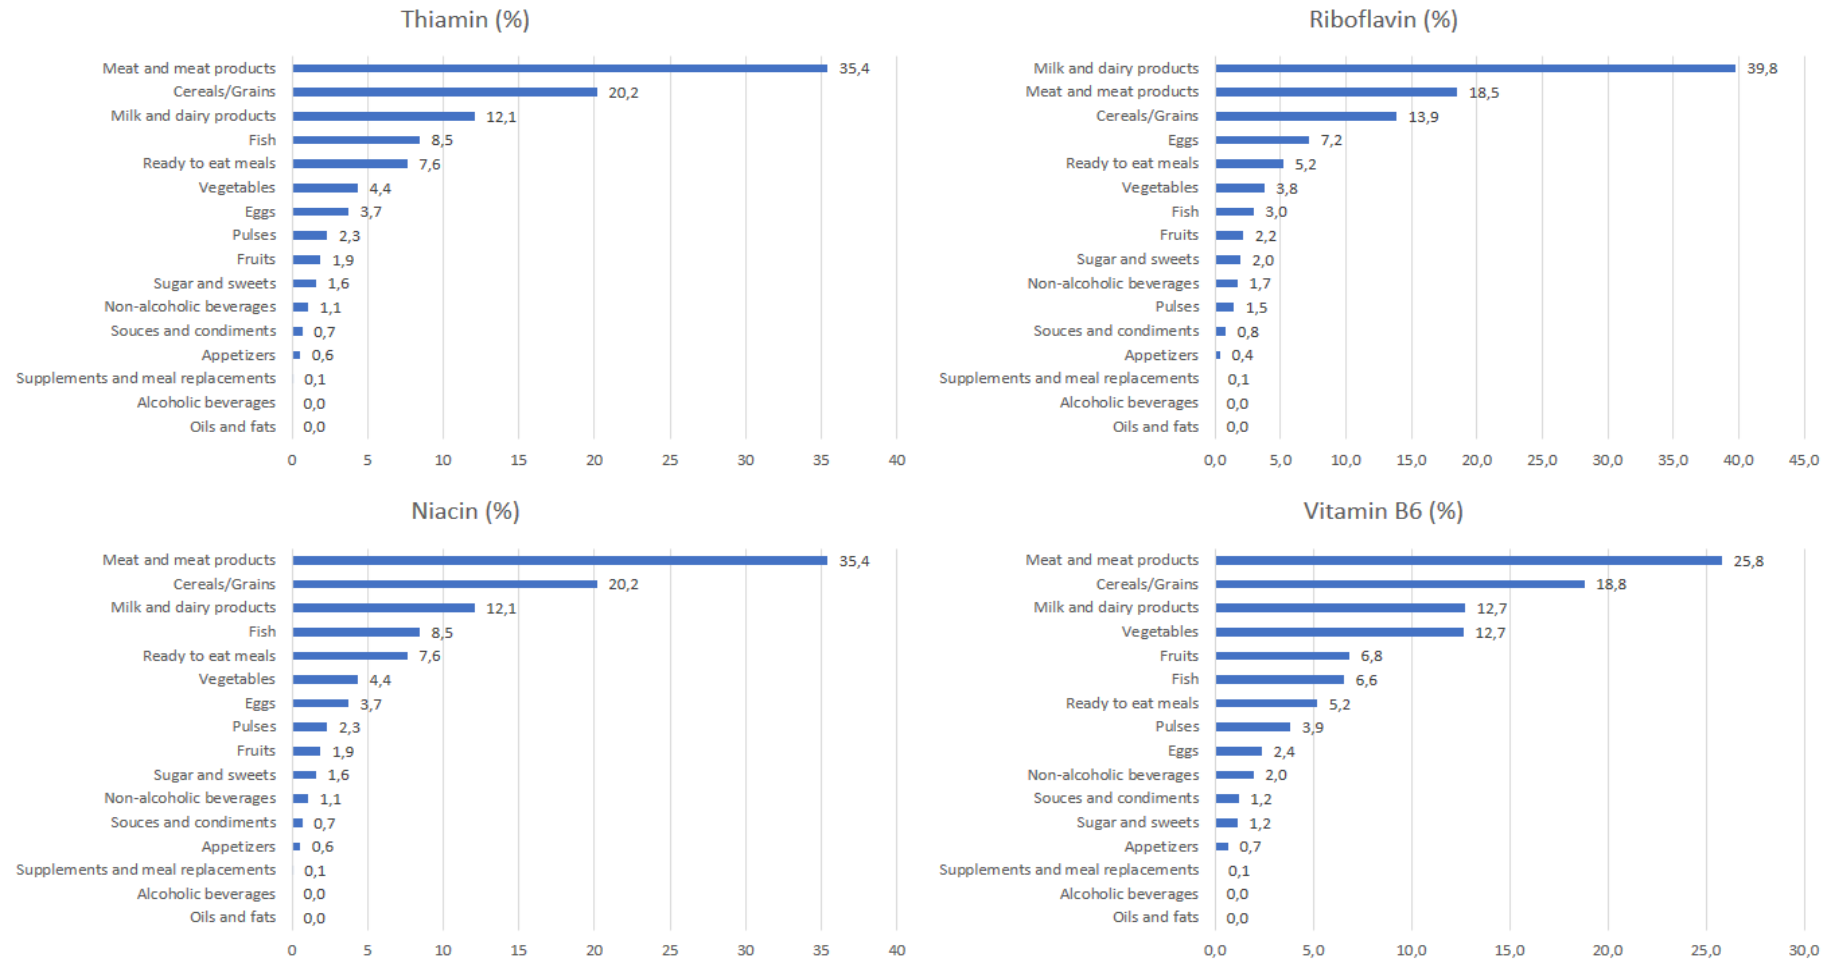

**Figure S2.** Contribution of food sources to the daily thiamin, riboflavin, niacin vitamins B6 intake in the ANIBES adolescents.

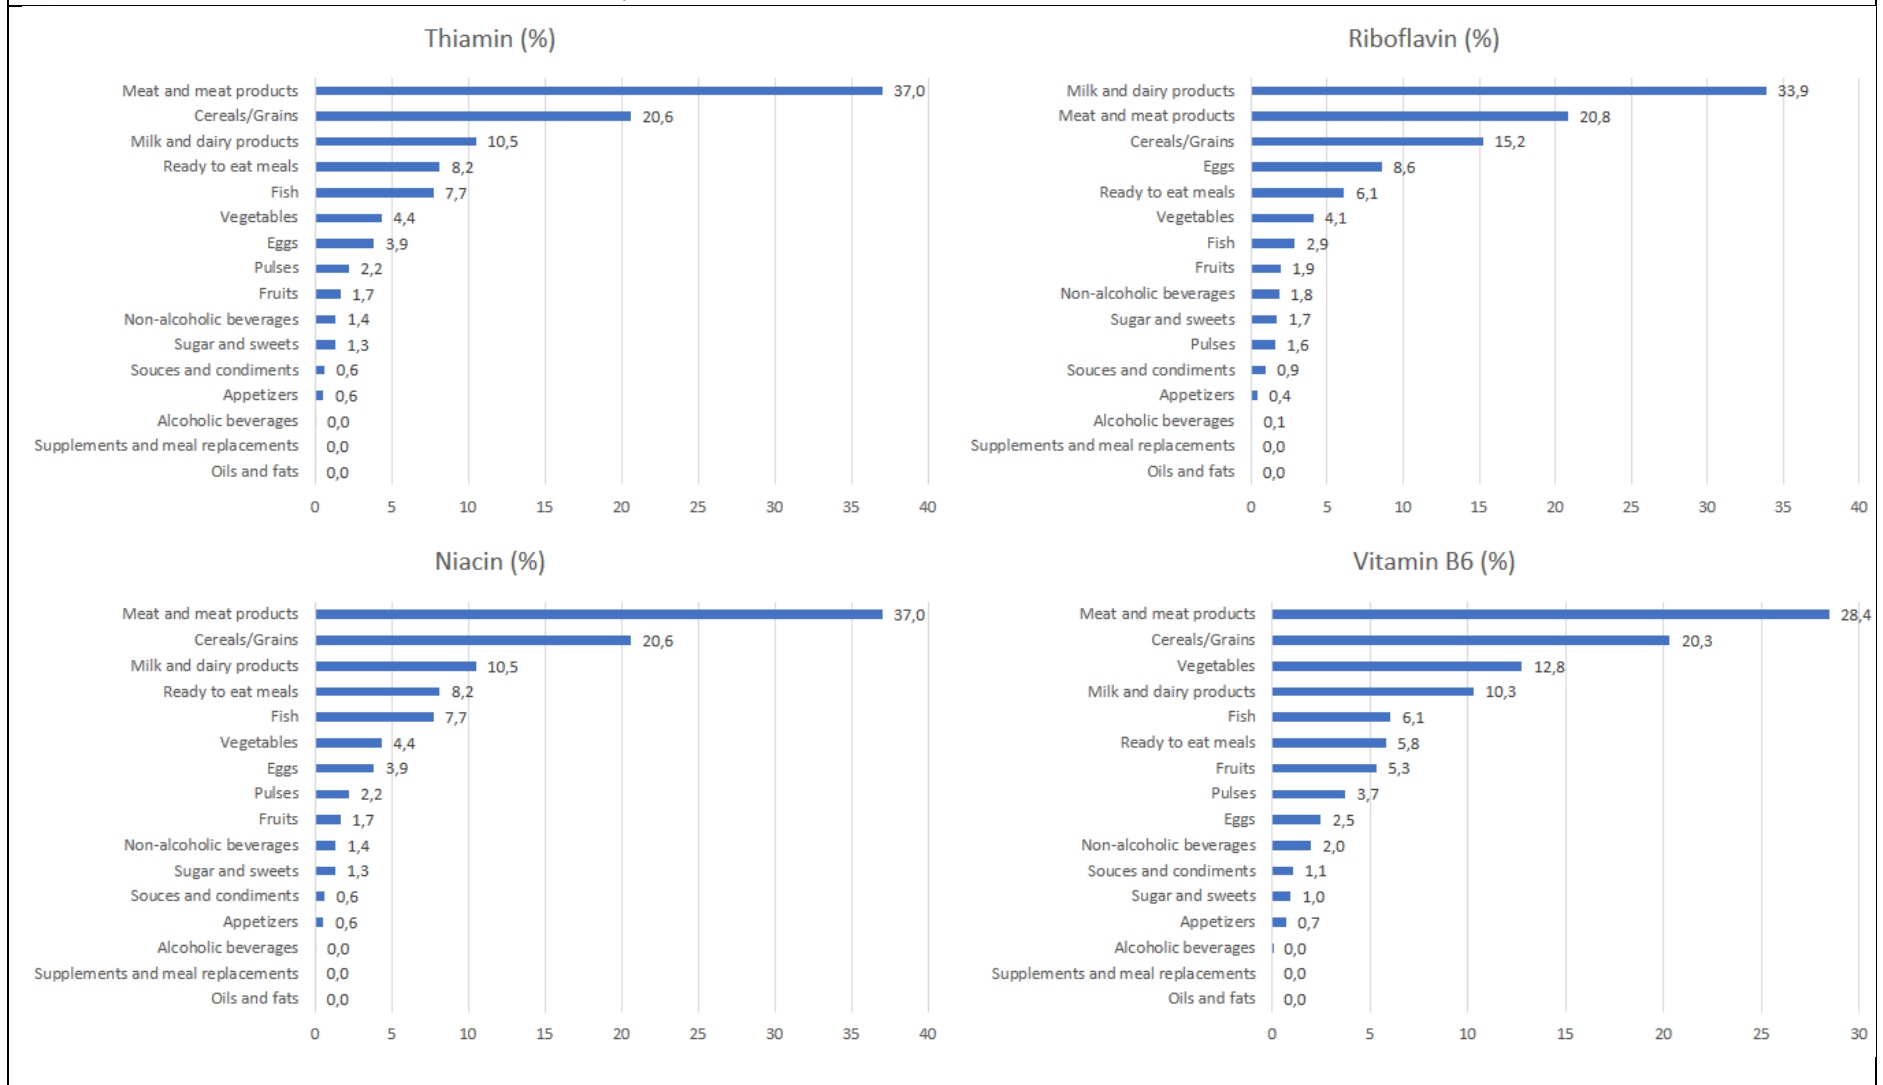

**Figure S3.** Contribution of food sources to the daily thiamin, riboflavin, niacin vitamins B6 intake in the ANIBES adults.

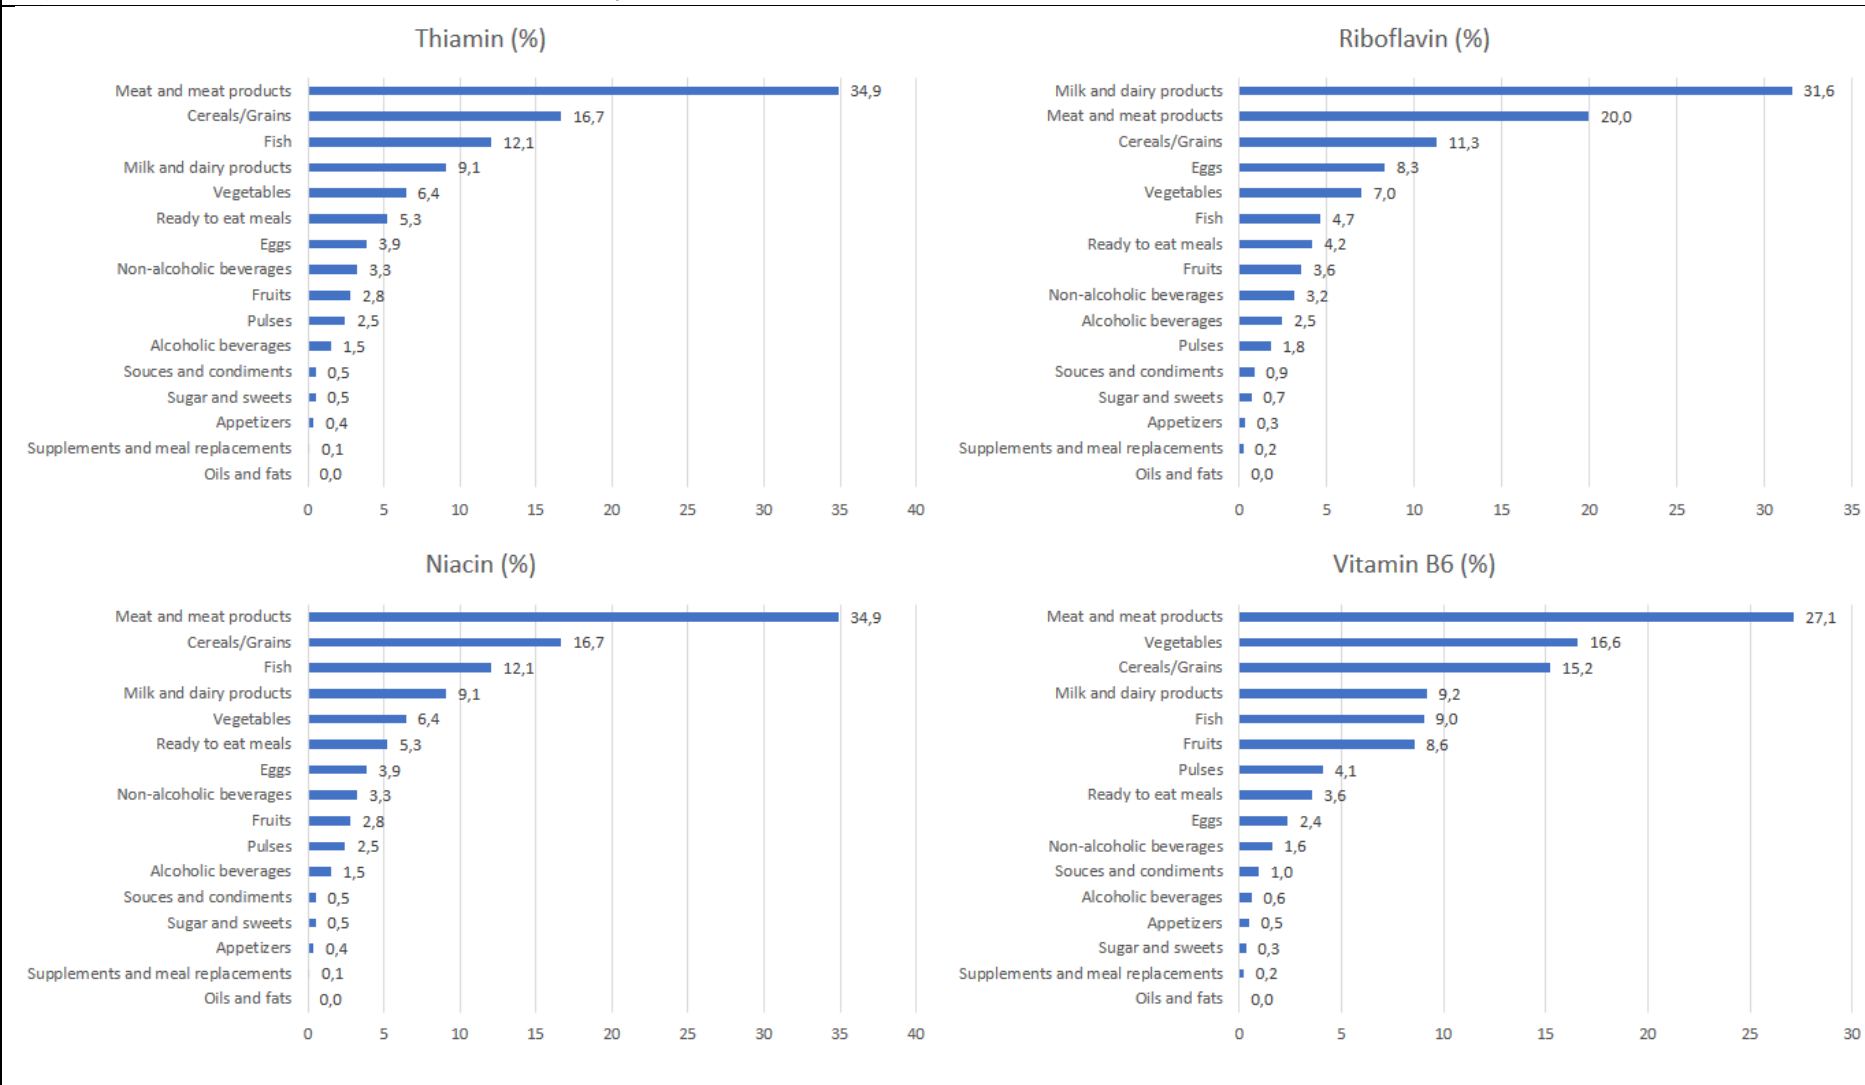

**Figure S4.** Contribution of food sources to the daily thiamin, riboflavin, niacin vitamins B6 intake in the ANIBES elderly.

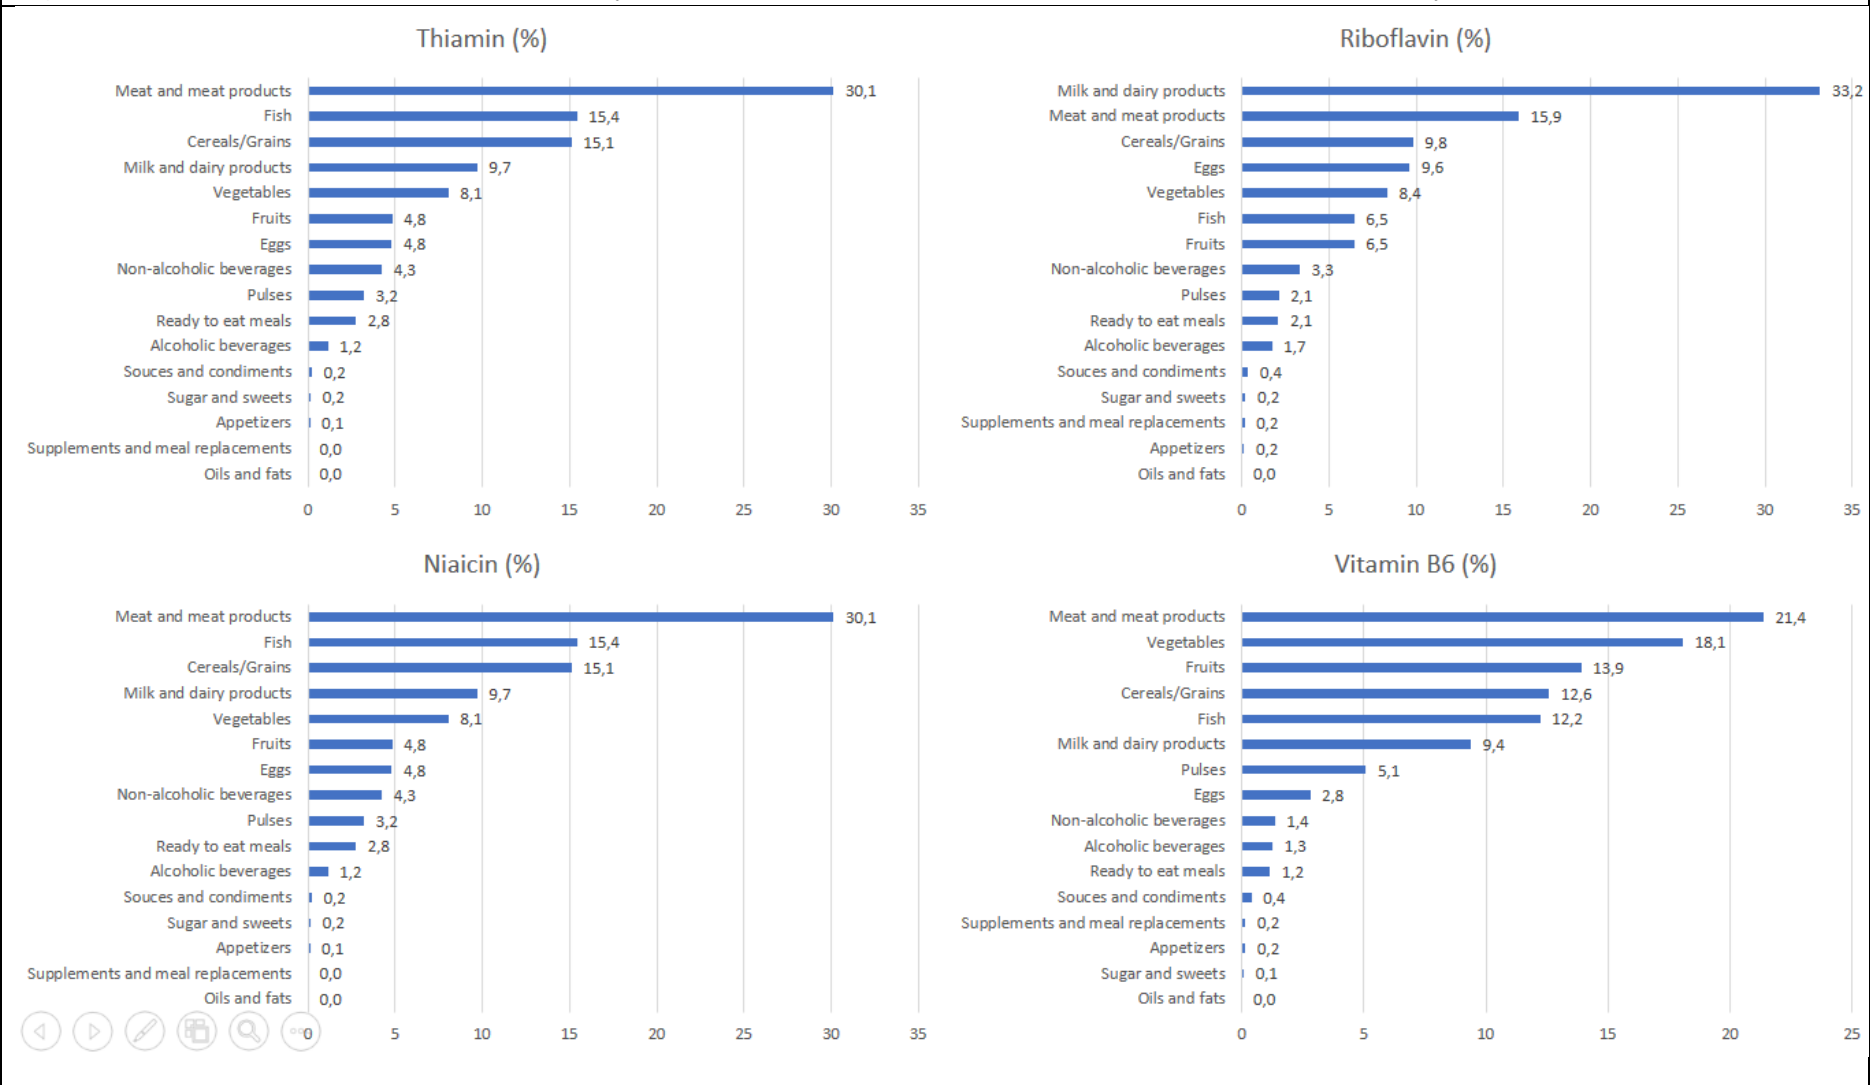

Supplement: s1 [file s1]
